# Supplementary material
Source: publisher site journal article supplement (https://www.dovepress.com/article/462833)
Supplement: Supplementary file 1 [file get_supplementary_file.php]

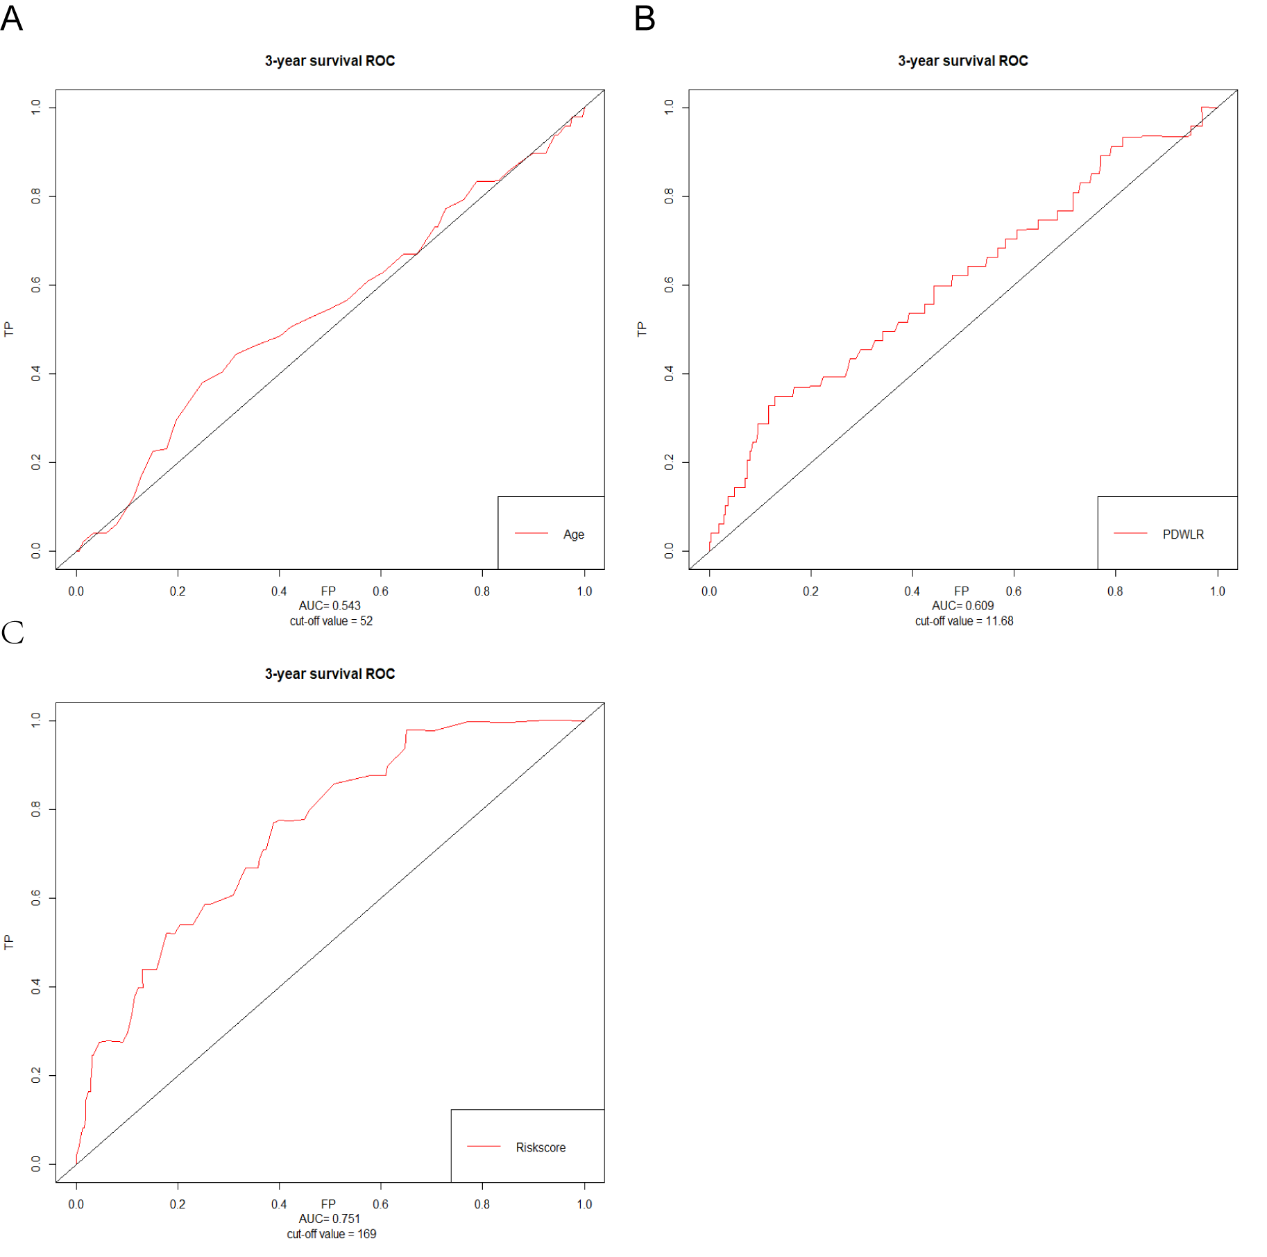
**Supplementary Figure 1** 3-year survival ROC curves of continuous variables.

**Notes:** (A) 3-year survival ROC curve of Age; (B) 3-year survival ROC curve of PDWLR; (C) 3-year survival ROC curve of Riskscore.

**Abbreviations:** ROC, receiver operating characteristic; PDWLR, platelet distribution width to lymphocyte ratio.

**Supplementary Table S1** Score of each factor in the nomogram

| factors | score |
| --- | --- |
| **Age** |  |
| ≤52 | 0 |
| >52 | 42 |
| **Gender** |  |
| Female | 0 |
| Male | 51 |
| **EBVDNA** |  |
| <5000 | 0 |
| ≥5000 | 32 |
| **T stage** |  |
| T1 | 0 |
| T2 | 6 |
| T3 | 7 |
| T4 | 56 |
| **N stage** |  |
| N0 | 0 |
| N1 | 56 |
| N2 | 67 |
| N3 | 100 |
| **PDWLR** |  |
| ≤11.68 | 0 |
| >11.68 | 70 |
| **3-years survival probability** |  |
| 0.2 | 363 |
| 0.3 | 342 |
| 0.4 | 322 |
| 0.5 | 302 |
| 0.6 | 280 |
| 0.7 | 254 |
| 0.8 | 219 |
| 0.9 | 165 |
| **5-years survival probability** |  |
| 0.1 | 344 |
| 0.2 | 318 |
| 0.3 | 297 |
| 0.4 | 277 |
| 0.5 | 257 |
| 0.6 | 234 |
| 0.7 | 208 |
| 0.8 | 174 |
| 0.9 | 119 |

**Abbreviations:** PDWLR, platelet distribution width to lymphocyte ratio.
